# Supplementary material for: Cis-acting mutation affecting GJA5 transcription is underlying the Melanotic within-feather pigmentation pattern in chickens
Source: Proc Natl Acad Sci U S A. 2021 Oct 4;118(41):e2109363118. doi: 10.1073/pnas.2109363118 (PMC8521658; doi:10.1073/pnas.2109363118)
Supplement: Supplementary File [file pnas.2109363118.sapp.pdf]

## **Supplementary Information Appendix**

### **Supplementary Text: Methods**

### **Supplementary Fig. S1**

### **Supplementary Tables S1-8**

## Supplementary Text

### Methods

**Animals:** The animal procedures used in this study were approved by the Institutional Animal Care and Use Committee at Virginia Polytechnic Institute and State University. A linkage mapping population was initiated by crossing two Partridge Plymouth Rock males with four Dark Cornish females, all purchased from Murray McMurray Hatchery ([www.mcmurrayhatchery.com](http://www.mcmurrayhatchery.com), Webster City, Iowa, USA). Backcross matings between 17 F<sub>1</sub> females and 2 F<sub>0</sub> Partridge Plymouth Rock males produced 126 female progenies. Only females were considered in the analysis of the backcross population because pencilling or double lacing patterns are not observed in males. At 12 weeks of age, chickens with pencilling (n = 60), double lacing (n = 43), or intermediate patterns (n = 23) in the backcross population were classified by the same individual. Tissue samples (feather follicles, hypothalamus, intestine, liver, lung, muscle, and skin) for RNA isolation, immunostaining, and *in situ* hybridization were collected from two adult Dark Cornish hens and two adult Partridge Plymouth Rock hens. Feather follicle samples for RNA isolation were also collected from our in-house chicken population, which are three F<sub>1</sub> individuals from the mating between red junglefowl and Silver Sebright. The tissue sample collections followed the guidelines of Institutional Animal Care and Use Committee at Texas A&M University College of Veterinary Medicine & Biomedical Sciences.

**SNP-MaP analysis:** Two DNA pools were constructed based on the phenotypes of the backcross individuals (Pool\_pencilling and Pool\_double\_lacing). Each individual contributed 250 ng of genomic DNA to the pool. The *MI* gene was initially mapped by estimating SNP allele frequencies using the two DNA pools. This was accomplished using a high-density 600K chicken SNP genotyping array (by Affymetrix, 560,086 SNPs in total) and data were analyzed using the SNP-MaP (SNP Microarray and Pooling) approach (1). The genotyping array provided an intensity reading for the two alleles (X and Y) at each of the 560,086 SNPs that were reliably scored in this material. Relative allele frequencies (RAF) at each SNP for each DNA pool were calculated as  $X/(X + Y)$ , where X and Y represented the intensity signals of each allele. For each SNP, absolute RAF differences (absRAFdif) were calculated by pairwise comparisons between Pool\_pencilling and Pool\_double\_lacing. The absRAFdif was then plotted against SNP genomic locations (2). The absRAFdif value of a SNP was expected to peak in the vicinity of *MI*.

**Whole genome sequencing (WGS):** Two DNA pools were constructed using the parental individuals in our mapping population (Pool\_Cornish and Pool\_Plymouth\_Rock). These were subjected to whole genome sequencing together with two pools of backcross individuals (Pool\_pencilling and Pool\_double\_lacing). Each of the four pools were sequenced to 30X coverage on Illumina HiSeqX with 2x150 bp paired-end reads.

These WGS data, except the two pools of backcross individuals, together with publicly available WGS data from 92 individuals or pooled samples were analyzed (*SI Appendix*, Table S3). The latter included 11 samples presumably fixed for the *MI* allele

whereas the remaining 81 samples carried the wild-type allele *ml*<sup>+</sup>. All Illumina paired-end FASTQ data were aligned to the red junglefowl genome assembly version GalGal6 using BWA (version: 0.7.12) (3), sorted with SAMtools (version: 1.6) (4), and variants were called with GATK HaplotypeCaller 3.8 (5). Structural variants were called with Lumpy (version: 0.2.13) (6). Sequence data from the backcross population (Pool\_pencilling and Pool\_double\_lacing) were analyzed according to the same procedure, and were used to calculate pairwise *F*<sub>ST</sub> values with Popoolation2 (7) in a sliding window approach with window size of 50 kb and step size of 10 kb and pool sizes of 60 pencilling individuals: 43 double lacing individuals. The *F*<sub>ST</sub> values were Z-transformed and plotted against genomic locations.

**Linkage mapping:** The absRAFdif from SNP-MaP are arbitrary, because of possible microarray-based intensity variation and potential imprecision when construction DNA pools (8). Therefore, individual genotyping was necessary to confirm the allele frequencies and further reduce the candidate region. For the first round of linkage mapping, we selected six SNPs (*SI Appendix*, Table S1) with relatively high absRAFdif values (when comparing the backcross populations, the maximum absRAFdif is 0.5 in theory) within the peak region on chromosome 1 for further analysis, via the Kompetitive allele-specific PCR assay (KASP), developed by LGC Genomics (Beverly, MA, USA; [www.lgcgenomics.com](http://www.lgcgenomics.com)) (9). The six SNPs were genotyped using individual samples of all the F<sub>0</sub>, F<sub>1</sub>, and backcross females with pencilling or double lacing phenotypes, from the linkage mapping population. KASP assays were conducted following the manual with minor modifications. Genotyping results were validated by at least two replicates for each sample. Linkage mapping was carried out using the CRIMAP software (10) including the calculation of map distances and log10 odds ratio (LOD) between individual SNPs and *Melanotic*.

Within the candidate region defined by two of these six SNPs, ten more SNPs, fixed for different alleles in the parental lines and identified by whole genome sequencing, were selected for genotyping (*SI Appendix*, Table S2). These ten SNPs were used for a second round of linkage mapping, using only five recombinant backcross individuals via standard PCR and Sanger sequencing.

**Diagnostic test:** After the analysis of the candidate region based on the second round of linkage mapping, six sequence variants were identified as candidate causal mutations, which includes two InDels and four SNPs (*SI Appendix*, Table S4). A collection of 101 DNA samples from 52 different populations of chickens was studied focusing only on these six mutations. Nineteen of these populations carry *Melanotic* while the remaining thirty-three are wild-type at the *Ml* locus (*SI Appendix*, Table S5). Each of these samples were genotyped by fragment analysis following standard PCR amplifications for the two InDels in *SI Appendix*, Table S4. Three PCR primers were used for genotyping each of the two InDels (*SI Appendix*, Table S6), following the standard protocol of Platinum™ Green Hot Start PCR Master Mix (2X) (Invitrogen) with minor modifications. With the similar PCR protocol, a pair of primers for amplifying and sequencing the *MC1R* coding region (*SI Appendix*, Table S6) were also used to genotype all backcross individuals in the mapping population. Each of the samples listed in *SI Appendix*, Table S5 were genotyped via KASP for the four SNPs in *SI Appendix*, Table S4.

**Quantitative real-time RT-PCR:** Total RNA was extracted using Quick-RNA Miniprep Plus Kit (Zymo Research). First-strand cDNA was synthesized using SuperScript<sup>TM</sup> IV VILO<sup>TM</sup> Master Mix (Invitrogen). qPCRs were conducted with PowerUp<sup>TM</sup> SYBR<sup>TM</sup> Green Master Mix (Applied Biosystems). The products were detected with Bio-Rad CFX384 Touch<sup>TM</sup> Real-Time PCR Detection System. Details of the qPCR analysis including primer sequences are listed in Table S6. Each qPCR assay was carried out using three technical replicates.

**Allelic imbalance test:** Total RNA was extracted using Quick-RNA Miniprep Plus Kit (Zymo Research). First-strand cDNA was synthesized using SuperScript<sup>TM</sup> IV VILO<sup>TM</sup> Master Mix (Invitrogen). Two PCR primers were designed to quantify the allelic imbalance of *GJA5* expression: genomic DNA (gDNA) was amplified using GJA5\_AI\_F and GJA5\_AI\_R, while cDNA was amplified using GJA5\_A\_F or GJA5\_B\_F (for two different transcripts of *GJA5*) with the same reverse primer, respectively (*SI Appendix*, Table S6). PCR products from three cDNA samples which came from the three F<sub>1</sub> individuals together with PCR products from gDNA of the same three individuals, were Sanger sequenced using the same reverse primer. The peak heights for three SNPs, rs313638830 and rs731128040 found in transcript NM\_205504.2 and rs312762853 found in transcript XM\_015295951.2, were quantified using the PeakPicker 2 software (11). Allelic imbalance was estimated as the ratios of the peak height of the *MI* allele over the *ml*<sup>+</sup> allele in the cDNA or gDNA.

**Section immunostaining and *in situ* hybridization:** Fixed embryos were embedded in paraffin and sectioned at 6-7 µm. After de-paraffinization, sections were processed to immunohistochemistry or *in situ* hybridization. The antibody to MITF was from Abcam (ab122982). The peroxidase staining was used after primary antibody treatment with procedures described (12).

Non-radioactive *in situ* hybridization was performed according to procedures previously described (13). Briefly, the sections were treated with proteinase K (10 µg/ml in PBS) for 20 min, re-fixed with 0.2% glutaraldehyde/4% paraformaldehyde, and rinsed with PBT. The sections were then prehybridized in hybridization buffer (containing 50% formamide, 5x sodium citrate/sodium chloride buffer, 1% sodium dodecyl sulfate, 50 µg/ml heparin, 50 µg/ml tRNA) at 65°C for one hour. After prehybridization, sections were placed in new prehybridization buffer containing 1-3 µg/ml digoxigenin-labeled riboprobes and hybridized overnight at 65°C. Finally, sections were incubated with alkaline phosphatase conjugated anti-digoxigenin Fab (Roche, Indianapolis, IN) overnight. Positive signals were detected by incubating the specimens with NBT/BCIP substrates (Promega, Madison). *In situ* hybridization primers for chicken MeLEM (*GSTA3*) are: GG\_GSTA3\_F (5'-GGGAAGGATCTGAAGGAGAG-3') and GG\_GSTA3\_R (5'-TGAAGAAAGACACATCACAA-3'). Primers for *ASIP* and *GJA5* are according to Inaba *et al.* (14).

**Reporter assay:** Previous Cap Analysis of Gene Expression (CAGE) analysis detected the position of one of the transcription start sites (TSSs) of chicken *GJA5* using mRNA from whole embryo samples (15). The 1,869 bp sequence (*SI Appendix*, Fig. S1A)

upstream from this TSS in wild-type and mutant *GJA5* alleles, including InDel1 and SNP rs316201461, were synthesized *in vitro* and cloned into the promoterless Firefly Luciferase vector pGL4.15[luc2P/Hygro] by Genscript (Leiden, Netherlands). pRL-TK plasmid monitoring the transfection efficiency was purchased from Promega (E2241). Five ng of each plasmid was used to transform the XL1-Blue competent cells (Agilent, 200236), and plasmid DNA was subsequently prepared from 200 ml overnight culture with an EndoFree plasmid Maxi Kit (Qiagen).

DF-1 chicken fibroblast cells (16) were a gift from Dr. Benjamin Schusser (Technical University of Munich). The DF-1 cells were maintained in DMEM supplemented with 10% FBS, 100 U/ml penicillin, 100 µg/ml streptomycin and 292 µg/ml L-Glutamine (ThermoFisher Scientific) at 39°C with 5% CO<sub>2</sub>. On day 1, an aliquot of 2.5 X 10<sup>4</sup> cells/well were seeded in a 48-well plate. On the next day, a plasmid mixture containing 247.5 ng pGL4.15[luc2P/Hygro] with or without *GJA5* promoters and 2.5 ng pRL-TK was applied to transfect each well of cells using jetPRIME transfection reagent (Polyplus). Four replicates were used for each promoter construct. Medium was replaced by fresh medium 4 h after transfection. On day 3, luminescence of each well was analyzed using a Dual-Luciferase Reporter assay (Promega) on an Infinite M200 Microplate Reader (Tecan Group Ltd., Switzerland), and the luciferase activity was represented as the ratio of firefly (pGL4.15[luc2P/Hygro]) to Renilla (pRL-TK) luminescence.

**TRANSFAC analysis:** Predictions of putative transcription factor binding sites were done by the MATCH program in the TRANSFAC database (17). The vertebrate database was used and only predicted binding sites with a matrix score of 1.0 were selected for further analysis.

### Literature cited in Supplementary Text

1. S. J. Docherty, L. M. Butcher, L. C. Schalkwyk, R. Plomin, Applicability of DNA pools on 500 K SNP microarrays for cost-effective initial screens in genomewide association studies. *BMC Genomics* **8**, 214 (2007).
2. K. L. Wells, *et al.*, Genome-wide SNP scan of pooled DNA reveals nonsense mutation in *FGF20* in the scaleless line of featherless chickens. *BMC Genomics* **13**, 257 (2012).
3. H. Li, Aligning sequence reads, clone sequences and assembly contigs with BWA-MEM. *arXiv Prepr. arXiv1303.3997* (2013) (January 12, 2021).
4. H. Li, *et al.*, The Sequence Alignment/Map format and SAMtools. *Bioinformatics* **25**, 2078–2079 (2009).
5. R. Poplin, *et al.*, Scaling accurate genetic variant discovery to tens of thousands of samples. *bioRxiv*. <https://doi.org/10.1101/201178> (2017) <https://doi.org/10.1101/201178>.

6. R. M. Layer, C. Chiang, A. R. Quinlan, I. M. Hall, LUMPY: A probabilistic framework for structural variant discovery. *Genome Biol.* **15**, R84 (2014).
7. R. Kofler, R. V. Pandey, C. Schlotterer, PoPoolation2: identifying differentiation between populations using sequencing of pooled DNA samples (Pool-Seq). *Bioinformatics* **27**, 3435–3436 (2011).
8. S. Macgregor, Most pooling variation in array-based DNA pooling is attributable to array error rather than pool construction error. *Eur. J. Hum. Genet.* **15**, 501–504 (2007).
9. K. Semagn, R. Babu, S. Hearne, M. Olsen, Single nucleotide polymorphism genotyping using Kompetitive Allele Specific PCR (KASP): overview of the technology and its application in crop improvement. *Mol. Breed.* **33**, 1–14 (2014).
10. P. Green, K. Falls, S. Crooks, *Documentation for CRIMAP, version 2.4* (Washington University School of Medicine, 1990) (January 10, 2020).
11. B. Ge, *et al.*, Survey of allelic expression using EST mining. *Genome Res.* **15**, 1584–1591 (2005).
12. S. J. Lin, *et al.*, Topology of feather melanocyte progenitor niche allows complex pigment patterns to emerge. *Science*. **340**, 1442–1445 (2013).
13. A. Li, *et al.*, Diverse feather shape evolution enabled by coupling anisotropic signalling modules with self-organizing branching programme. *Nat. Commun.* **8**, 1–13 (2017).
14. M. Inaba, *et al.*, Instructive role of melanocytes during pigment pattern formation of the avian skin. *Proc. Natl. Acad. Sci. U. S. A.* **116**, 6884–6890 (2019).
15. M. Lizio, *et al.*, Systematic analysis of transcription start sites in avian development. *PLOS Biol.* **15**, e2002887 (2017).
16. M. Himly, D. N. Foster, I. Bottoli, J. S. Iacovoni, P. K. Vogt, The DF-1 chicken fibroblast cell line: Transformation induced by diverse oncogenes and cell death resulting from infection by avian leukosis viruses. *Virology* **248**, 295–304 (1998).
17. A. E. Kel, *et al.*, MATCH<sup>TM</sup>: a tool for searching transcription factor binding sites in DNA sequences. *Nucleic Acids Res.* **31**, 3576–3579 (2003).

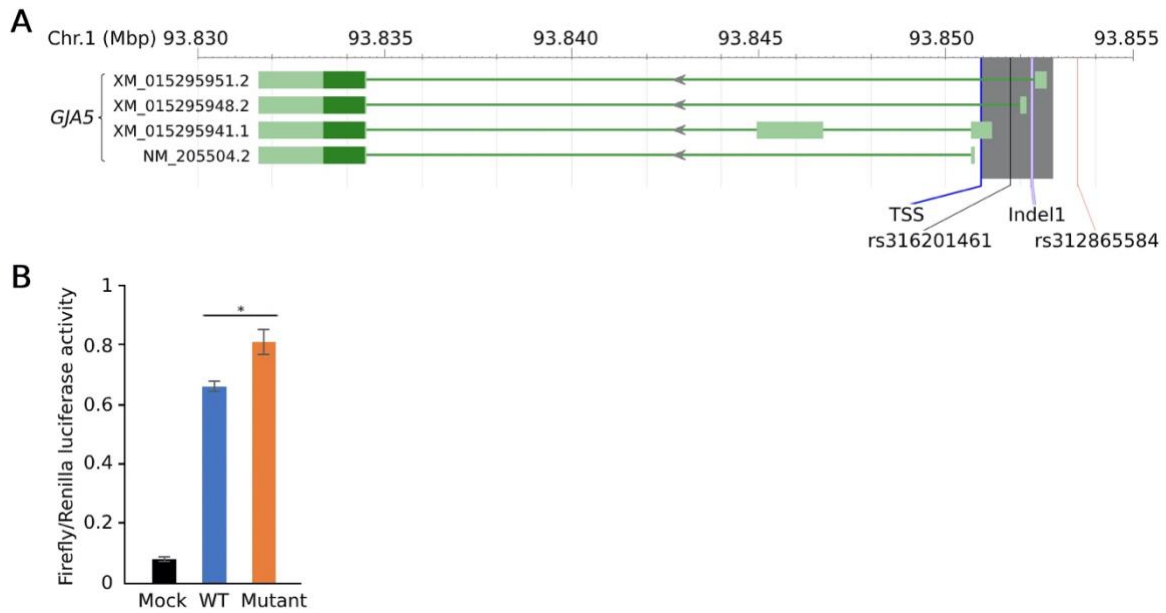

**Fig. S1.** Reporter assay suggesting a regulatory effect of the *MI* haplotype. **(A)** The dark grey area indicates the 1,869 bp sequence at the 5' end of *GJA5* used in the reporter assay, including one SNP and InDel1. TSS: predicted transcription start site (S. Foissac, *et al.*, Multi-species annotation of transcriptome and chromatin structure in domesticated animals. *BMC Biol.* **17**, 108 (2019)). **(B)** Results of dual-luciferase reporter assay represented as mean  $\pm$  SEM of quadruplicate samples.

**Table S1.** First round of linkage mapping of *Melanotic* using individual SNP analysis

| dbSNP       | absRAFdif <sup>a</sup> | Position on Chr. 1<br>(bp) | Genetic distance from <i>Melanotic</i><br>(cM) <sup>b</sup> | LOD<br>score <sup>b</sup> |
|-------------|------------------------|----------------------------|-------------------------------------------------------------|---------------------------|
| rs313722403 | 0.42                   | 87,572,229                 | 15.8                                                        | 11.7                      |
| rs316117302 | 0.50                   | 90,527,754                 | 3.9                                                         | 23.7                      |
| rs314066698 | 0.49                   | 93,048,147                 | 1.9                                                         | 26.7                      |
| rs314825166 | 0.45                   | 94,632,771                 | 2.9                                                         | 25.1                      |
| rs13908401  | 0.41                   | 98,040,916                 | 8.7                                                         | 17.8                      |
| rs317883641 | 0.37                   | 101,886,057                | 10.7                                                        | 15.8                      |

<sup>a</sup> Calculated by contrasting RAF values for pencilling and double lacing DNA pools

<sup>b</sup> Calculated using the CRIMAP software, a LOD score > 3.0 is considered genome-wide significant

**Table S2.** Genetic markers used for the second round of linkage mapping of *Melanotic*

| dbSNP                    | Position on<br>Chr. 1 (bp) | Allele in<br>Plymouth<br>Rock | Allele in<br>Cornish | Primer sequence (5'-3')                                |
|--------------------------|----------------------------|-------------------------------|----------------------|--------------------------------------------------------|
| rs314254723 <sup>a</sup> | 93,362,467                 | C                             | T                    | F: TCTCCAGCCTCCCTTATCCA<br>R: CCCGCAGATAGACACAACCA     |
| rs316556553 <sup>a</sup> | 93,438,578                 | C                             | T                    | F: CTGGCTTTCCTGTTCCCTCTTA<br>R: CTCATCTCACTGCTCACCACCT |
| rs317325096 <sup>a</sup> | 93,577,739                 | T                             | C                    | F: ACTGCCGTTGCATTGTGTTC<br>R: AACCTTCAGGATAATGGCTGGA   |
| rs15347589 <sup>a</sup>  | 93,641,597                 | G                             | A                    | F: GAGAGGAGGCAGCGTGTCTT<br>R: CCCGACTCAACTTCCCTGTC     |
| rs14859493               | 93,720,150                 | T                             | C                    | F: AACAAGGATGGTGGGCAATC<br>R: ATCCCCTCGCACCTACAGAG     |
| rs316851065              | 93,757,350                 | T                             | G                    | F: CAGCTCCCTTCTTCTGTTCAT<br>R: CCAGGGAGACGAGGAACTAGA   |
| rs13686931               | 93,811,196                 | A                             | G                    | F: ACACTGTGCCACCCTGTGTC<br>R: TGCAGATGTGACCCTCGAAC     |
| rs13905107               | 93,918,761                 | C                             | T                    | F: GCAAATATCCCTCCCTGCAC<br>R: CATTGGAGGACTTGCTGCTG     |
| rs317124570              | 94,255,352                 | A                             | G                    | F: CCAGCCCCAAACTCTTCTTG<br>R: AGCCATGCTCAGCTGTTTGA     |
| rs317781986 <sup>a</sup> | 94,458,113                 | A                             | G                    | F: ACCAAACTCCAGCATCAGCA<br>R: TCCCATTACTGAAACGTGTGGA   |

<sup>a</sup> SNPs that show recombination in any of the five individuals used in the second round of linkage mapping. No recombination was found for the other SNPs, defining the candidate region of *Melanotic*.

**Table S3.** Public whole genome sequence data used in this study. This includes only samples that shows a periodic feather pattern because we cannot deduce the presence/absence of *MI* in birds that show a non-periodic pattern like Buff, Columbian, and Black. The exception to this rule is Polish White Crested Black chicken because a previous study demonstrated that they carry *MI* (J. W. Moore, J. R. Smyth, Melanotic: Key to a phenotypic enigma in the fowl. *J. Hered.* **62**, 215–219 (1971)). Information on *GJA5*, *Dark brown/SOX10* and *MC1R* were deduced from whole genome sequence data.

| Breed <sup>a</sup>   | Phenotype             | Library type | BioSample accession | Genotyp <sup>e</sup> <sub>b</sub>               | <i>GJA5</i> Indel1   | <i>Dark brown</i> <i>SOX10</i>                  | <i>MC1R</i> mutation <sup>c</sup> |
|----------------------|-----------------------|--------------|---------------------|-------------------------------------------------|----------------------|-------------------------------------------------|-----------------------------------|
| Dark Cornish         | Double Laced          | Pool         | SAMN16846413        | <i>MI</i> /-                                    | <i>Indel1/Indel1</i> | <i>db</i> <sup>+</sup> / <i>db</i> <sup>+</sup> | E92K or L133P                     |
| Dark Cornish         | Double Laced          | Individual   | SAMEA6529968        | <i>MI</i> /-                                    | <i>Indel1/Indel1</i> | <i>db</i> <sup>+</sup> / <i>db</i> <sup>+</sup> | L133P                             |
| Dark Cornish         | Double Laced          | Individual   | SAMN13380102        | <i>MI</i> /-                                    | <i>Indel1/Indel1</i> | <i>db</i> <sup>+</sup> / <i>db</i> <sup>+</sup> | E92K                              |
| Hamburg              | Silver Spangled       | Pool         | SAMN16846357        | <i>MI</i> /-                                    | <i>Indel1/Indel1</i> | <i>db</i> <sup>+</sup> / <i>db</i> <sup>+</sup> | E92K                              |
| Hamburg              | Silver Spangled White | Individual   | SAMEA6529977        | <i>MI</i> /-                                    | <i>Indel1/Indel1</i> | <i>Db/Db</i>                                    | E92K                              |
| Polish               | Crested Black White   | Individual   | SAMEA6529996        | <i>MI</i> /-                                    | <i>Indel1/Indel1</i> | <i>db</i> <sup>+</sup> / <i>db</i> <sup>+</sup> | E92K                              |
| Polish               | Crested Black White   | Individual   | SAMN03177328        | <i>MI</i> /-                                    | <i>Indel1/Indel1</i> | <i>db</i> <sup>+</sup> / <i>db</i> <sup>+</sup> | E92K/L133Q                        |
| Sebright             | Gold Laced            | Individual   | SAMEA6529948        | <i>MI</i> /-                                    | <i>Indel1/Indel1</i> | <i>Db/Db</i>                                    | E92K                              |
| Sebright             | Silver Laced          | Pool         | SAMEA104432213      | <i>MI</i> /-                                    | <i>Indel1/Indel1</i> | <i>Db/Db</i>                                    | E92K                              |
| Sebright             | Silver Laced          | Pool         | SAMN16846355        | <i>MI</i> /-                                    | <i>Indel1/Indel1</i> | <i>Db/Db</i>                                    | E92K                              |
| Sebright             | Silver Laced          | Individual   | SAMEA6529949        | <i>MI</i> /-                                    | <i>Indel1/Indel1</i> | <i>Db/Db</i>                                    | E92K                              |
| Wyandotte            | Silver Laced          | Individual   | SAMEA6529967        | <i>MI</i> /-                                    | <i>Indel1/Indel1</i> | <i>db</i> <sup>+</sup> / <i>db</i> <sup>+</sup> | E92K                              |
| Buttercup            | Autosomal barring     | Pool         | SAMN16846359        | <i>ml</i> <sup>+</sup> / <i>ml</i> <sup>+</sup> | <i>WT/WT</i>         | <i>Db/Db</i>                                    |                                   |
| Buttercup            | Autosomal barring     | Individual   | SAMN03177329        | <i>ml</i> <sup>+</sup> / <i>ml</i> <sup>+</sup> | <i>WT/WT</i>         | <i>db</i> <sup>+</sup> / <i>db</i> <sup>+</sup> |                                   |
| Cochin               | Pencilling            | Individual   | SAMN12236899        | <i>ml</i> <sup>+</sup> / <i>ml</i> <sup>+</sup> | <i>WT/WT</i>         | <i>db</i> <sup>+</sup> / <i>db</i> <sup>+</sup> |                                   |
| Cochin               | Pencilling            | Individual   | SAMN12236900        | <i>ml</i> <sup>+</sup> / <i>ml</i> <sup>+</sup> | <i>WT/WT</i>         | <i>db</i> <sup>+</sup> / <i>db</i> <sup>+</sup> |                                   |
| Cochin               | Pencilling            | Individual   | SAMN12236901        | <i>ml</i> <sup>+</sup> / <i>ml</i> <sup>+</sup> | <i>WT/WT</i>         | <i>db</i> <sup>+</sup> / <i>db</i> <sup>+</sup> |                                   |
| Cochin               | Pencilling            | Individual   | SAMN12236902        | <i>ml</i> <sup>+</sup> / <i>ml</i> <sup>+</sup> | <i>WT/WT</i>         | <i>db</i> <sup>+</sup> / <i>db</i> <sup>+</sup> |                                   |
| Cyan-shank Partridge | Pencilling            | Pool         | SAMN12990250        | <i>ml</i> <sup>+</sup> / <i>ml</i> <sup>+</sup> | <i>WT/WT</i>         | <i>db</i> <sup>+</sup> / <i>db</i> <sup>+</sup> |                                   |
| East Friesian Gull   | Pencilling            | Pool         | SAMEA104432208      | <i>ml</i> <sup>+</sup> / <i>ml</i> <sup>+</sup> | <i>WT/WT</i>         | <i>Db/Db</i>                                    |                                   |
| Fayoumi              | Autosomal barring     | Pool         | SAMN06612097        | <i>ml</i> <sup>+</sup> / <i>ml</i> <sup>+</sup> | <i>WT/WT</i>         | <i>Db/Db</i>                                    |                                   |
| Fayoumi              | Autosomal barring     | Pool         | SAMN16846360        | <i>ml</i> <sup>+</sup> / <i>ml</i> <sup>+</sup> | <i>WT/WT</i>         | <i>Db/Db</i>                                    |                                   |
| Indochinese          | Stippling             | Pool         | SAMEA104432194      | <i>ml</i> <sup>+</sup> / <i>ml</i> <sup>+</sup> | <i>WT/WT</i>         | <i>db</i> <sup>+</sup> / <i>db</i> <sup>+</sup> |                                   |

|               |            |            |              |                                      |              |                                      |
|---------------|------------|------------|--------------|--------------------------------------|--------------|--------------------------------------|
| RJF           |            |            |              |                                      |              |                                      |
| Java RJF      | Stippling  | Individual | SAMD00077852 | <i>ml<sup>+</sup>/ml<sup>+</sup></i> | <i>WT/WT</i> | <i>db<sup>+</sup>/db<sup>+</sup></i> |
| Java RJF      | Stippling  | Individual | SAMD00077853 | <i>ml<sup>+</sup>/ml<sup>+</sup></i> | <i>WT/WT</i> | <i>db<sup>+</sup>/db<sup>+</sup></i> |
| Java RJF      | Stippling  | Individual | SAMD00077854 | <i>ml<sup>+</sup>/ml<sup>+</sup></i> | <i>WT/WT</i> | <i>db<sup>+</sup>/db<sup>+</sup></i> |
| Plymouth Rock | Pencilling | Pool       | SAMN16846358 | <i>ml<sup>+</sup>/ml<sup>+</sup></i> | <i>WT/WT</i> | <i>db<sup>+</sup>/db<sup>+</sup></i> |
| RJF           | Stippling  | Individual | SAMN02333832 | <i>ml<sup>+</sup>/ml<sup>+</sup></i> | <i>WT/WT</i> | <i>db<sup>+</sup>/db<sup>+</sup></i> |
| RJF           | Stippling  | Individual | SAMN02333833 | <i>ml<sup>+</sup>/ml<sup>+</sup></i> | <i>WT/WT</i> | <i>db<sup>+</sup>/db<sup>+</sup></i> |
| RJF           | Stippling  | Individual | SAMN02486161 | <i>ml<sup>+</sup>/ml<sup>+</sup></i> | <i>WT/WT</i> | <i>db<sup>+</sup>/db<sup>+</sup></i> |
| RJF           | Stippling  | Individual | SAMN02712039 | <i>ml<sup>+</sup>/ml<sup>+</sup></i> | <i>WT/WT</i> | <i>db<sup>+</sup>/db<sup>+</sup></i> |
| RJF           | Stippling  | Individual | SAMN02712040 | <i>ml<sup>+</sup>/ml<sup>+</sup></i> | <i>WT/WT</i> | <i>db<sup>+</sup>/db<sup>+</sup></i> |
| RJF           | Stippling  | Individual | SAMN02712041 | <i>ml<sup>+</sup>/ml<sup>+</sup></i> | <i>WT/WT</i> | <i>db<sup>+</sup>/db<sup>+</sup></i> |
| RJF           | Stippling  | Individual | SAMN02712042 | <i>ml<sup>+</sup>/ml<sup>+</sup></i> | <i>WT/WT</i> | <i>db<sup>+</sup>/db<sup>+</sup></i> |
| RJF           | Stippling  | Individual | SAMN02712045 | <i>ml<sup>+</sup>/ml<sup>+</sup></i> | <i>WT/WT</i> | <i>db<sup>+</sup>/db<sup>+</sup></i> |
| RJF           | Stippling  | Individual | SAMN10471716 | <i>ml<sup>+</sup>/ml<sup>+</sup></i> | <i>WT/WT</i> | <i>db<sup>+</sup>/db<sup>+</sup></i> |
| RJF           | Stippling  | Individual | SAMN14651083 | <i>ml<sup>+</sup>/ml<sup>+</sup></i> | <i>WT/WT</i> | <i>db<sup>+</sup>/db<sup>+</sup></i> |
| RJF           | Stippling  | Individual | SAMN14814745 | <i>ml<sup>+</sup>/ml<sup>+</sup></i> | <i>WT/WT</i> | <i>db<sup>+</sup>/db<sup>+</sup></i> |
| RJF           | Stippling  | Individual | SAMN14814771 | <i>ml<sup>+</sup>/ml<sup>+</sup></i> | <i>WT/WT</i> | <i>db<sup>+</sup>/db<sup>+</sup></i> |
| RJF           | Stippling  | Individual | SAMN14814772 | <i>ml<sup>+</sup>/ml<sup>+</sup></i> | <i>WT/WT</i> | <i>db<sup>+</sup>/db<sup>+</sup></i> |
| RJF           | Stippling  | Individual | SAMN14814774 | <i>ml<sup>+</sup>/ml<sup>+</sup></i> | <i>WT/WT</i> | <i>db<sup>+</sup>/db<sup>+</sup></i> |
| RJF           | Stippling  | Individual | SAMN14814775 | <i>ml<sup>+</sup>/ml<sup>+</sup></i> | <i>WT/WT</i> | <i>db<sup>+</sup>/db<sup>+</sup></i> |
| RJF           | Stippling  | Individual | SAMN14814776 | <i>ml<sup>+</sup>/ml<sup>+</sup></i> | <i>WT/WT</i> | <i>db<sup>+</sup>/db<sup>+</sup></i> |
| RJF           | Stippling  | Individual | SAMN14814777 | <i>ml<sup>+</sup>/ml<sup>+</sup></i> | <i>WT/WT</i> | <i>db<sup>+</sup>/db<sup>+</sup></i> |
| RJF           | Stippling  | Individual | SAMN14814778 | <i>ml<sup>+</sup>/ml<sup>+</sup></i> | <i>WT/WT</i> | <i>db<sup>+</sup>/db<sup>+</sup></i> |
| RJF           | Stippling  | Individual | SAMN14814779 | <i>ml<sup>+</sup>/ml<sup>+</sup></i> | <i>WT/WT</i> | <i>db<sup>+</sup>/db<sup>+</sup></i> |
| RJF           | Stippling  | Individual | SAMN14814781 | <i>ml<sup>+</sup>/ml<sup>+</sup></i> | <i>WT/WT</i> | <i>db<sup>+</sup>/db<sup>+</sup></i> |
| RJF           | Stippling  | Individual | SAMN14814782 | <i>ml<sup>+</sup>/ml<sup>+</sup></i> | <i>WT/WT</i> | <i>db<sup>+</sup>/db<sup>+</sup></i> |
| RJF           | Stippling  | Individual | SAMN14814784 | <i>ml<sup>+</sup>/ml<sup>+</sup></i> | <i>WT/WT</i> | <i>db<sup>+</sup>/db<sup>+</sup></i> |
| RJF           | Stippling  | Individual | SAMN14814785 | <i>ml<sup>+</sup>/ml<sup>+</sup></i> | <i>WT/WT</i> | <i>db<sup>+</sup>/db<sup>+</sup></i> |
| RJF           | Stippling  | Individual | SAMN14814786 | <i>ml<sup>+</sup>/ml<sup>+</sup></i> | <i>WT/WT</i> | <i>db<sup>+</sup>/db<sup>+</sup></i> |
| RJF           | Stippling  | Individual | SAMN14814788 | <i>ml<sup>+</sup>/ml<sup>+</sup></i> | <i>WT/WT</i> | <i>db<sup>+</sup>/db<sup>+</sup></i> |
| RJF           | Stippling  | Individual | SAMN14814789 | <i>ml<sup>+</sup>/ml<sup>+</sup></i> | <i>WT/WT</i> | <i>db<sup>+</sup>/db<sup>+</sup></i> |
| RJF           | Stippling  | Individual | SAMN14814790 | <i>ml<sup>+</sup>/ml<sup>+</sup></i> | <i>WT/WT</i> | <i>db<sup>+</sup>/db<sup>+</sup></i> |
| RJF           | Stippling  | Individual | SAMN14814791 | <i>ml<sup>+</sup>/ml<sup>+</sup></i> | <i>WT/WT</i> | <i>db<sup>+</sup>/db<sup>+</sup></i> |
| RJF           | Stippling  | Individual | SAMN14814792 | <i>ml<sup>+</sup>/ml<sup>+</sup></i> | <i>WT/WT</i> | <i>db<sup>+</sup>/db<sup>+</sup></i> |
| RJF           | Stippling  | Individual | SAMN14814793 | <i>ml<sup>+</sup>/ml<sup>+</sup></i> | <i>WT/WT</i> | <i>db<sup>+</sup>/db<sup>+</sup></i> |
| RJF           | Stippling  | Individual | SAMN14814795 | <i>ml<sup>+</sup>/ml<sup>+</sup></i> | <i>WT/WT</i> | <i>db<sup>+</sup>/db<sup>+</sup></i> |
| RJF           | Stippling  | Individual | SAMN14814796 | <i>ml<sup>+</sup>/ml<sup>+</sup></i> | <i>WT/WT</i> | <i>db<sup>+</sup>/db<sup>+</sup></i> |
| RJF           | Stippling  | Individual | SAMN14814797 | <i>ml<sup>+</sup>/ml<sup>+</sup></i> | <i>WT/WT</i> | <i>db<sup>+</sup>/db<sup>+</sup></i> |
| RJF           | Stippling  | Individual | SAMN14814798 | <i>ml<sup>+</sup>/ml<sup>+</sup></i> | <i>WT/WT</i> | <i>db<sup>+</sup>/db<sup>+</sup></i> |
| RJF           | Stippling  | Individual | SAMN14814799 | <i>ml<sup>+</sup>/ml<sup>+</sup></i> | <i>WT/WT</i> | <i>db<sup>+</sup>/db<sup>+</sup></i> |
| RJF           | Stippling  | Individual | SAMN14814802 | <i>ml<sup>+</sup>/ml<sup>+</sup></i> | <i>WT/WT</i> | <i>db<sup>+</sup>/db<sup>+</sup></i> |
| RJF           | Stippling  | Individual | SAMN14814804 | <i>ml<sup>+</sup>/ml<sup>+</sup></i> | <i>WT/WT</i> | <i>db<sup>+</sup>/db<sup>+</sup></i> |
| RJF           | Stippling  | Individual | SAMN14814805 | <i>ml<sup>+</sup>/ml<sup>+</sup></i> | <i>WT/WT</i> | <i>db<sup>+</sup>/db<sup>+</sup></i> |
| RJF           | Stippling  | Individual | SAMN14814806 | <i>ml<sup>+</sup>/ml<sup>+</sup></i> | <i>WT/WT</i> | <i>db<sup>+</sup>/db<sup>+</sup></i> |

|              |           |            |              |                                      |              |                                      |
|--------------|-----------|------------|--------------|--------------------------------------|--------------|--------------------------------------|
| RJF          | Stippling | Individual | SAMN14814808 | <i>ml<sup>+</sup>/ml<sup>+</sup></i> | <i>WT/WT</i> | <i>db<sup>+</sup>/db<sup>+</sup></i> |
| RJF          | Stippling | Individual | SAMN14814809 | <i>ml<sup>+</sup>/ml<sup>+</sup></i> | <i>WT/WT</i> | <i>db<sup>+</sup>/db<sup>+</sup></i> |
| Sumatra RJF  | Stippling | Individual | SAMD00077855 | <i>ml<sup>+</sup>/ml<sup>+</sup></i> | <i>WT/WT</i> | <i>db<sup>+</sup>/db<sup>+</sup></i> |
| Sumatra RJF  | Stippling | Individual | SAMD00077856 | <i>ml<sup>+</sup>/ml<sup>+</sup></i> | <i>WT/WT</i> | <i>db<sup>+</sup>/db<sup>+</sup></i> |
| Thailand RJF | Stippling | Individual | SAMEA5160200 | <i>ml<sup>+</sup>/ml<sup>+</sup></i> | <i>WT/WT</i> | <i>db<sup>+</sup>/db<sup>+</sup></i> |
| Thailand RJF | Stippling | Individual | SAMEA5160201 | <i>ml<sup>+</sup>/ml<sup>+</sup></i> | <i>WT/WT</i> | <i>db<sup>+</sup>/db<sup>+</sup></i> |
| Thailand RJF | Stippling | Individual | SAMEA5160202 | <i>ml<sup>+</sup>/ml<sup>+</sup></i> | <i>WT/WT</i> | <i>db<sup>+</sup>/db<sup>+</sup></i> |
| Thailand RJF | Stippling | Individual | SAMEA5160203 | <i>ml<sup>+</sup>/ml<sup>+</sup></i> | <i>WT/WT</i> | <i>db<sup>+</sup>/db<sup>+</sup></i> |
| Thailand RJF | Stippling | Individual | SAMEA5160204 | <i>ml<sup>+</sup>/ml<sup>+</sup></i> | <i>WT/WT</i> | <i>db<sup>+</sup>/db<sup>+</sup></i> |
| Thailand RJF | Stippling | Individual | SAMEA5160205 | <i>ml<sup>+</sup>/ml<sup>+</sup></i> | <i>WT/WT</i> | <i>db<sup>+</sup>/db<sup>+</sup></i> |
| Thailand RJF | Stippling | Individual | SAMEA5160206 | <i>ml<sup>+</sup>/ml<sup>+</sup></i> | <i>WT/WT</i> | <i>db<sup>+</sup>/db<sup>+</sup></i> |
| Thailand RJF | Stippling | Individual | SAMEA5160207 | <i>ml<sup>+</sup>/ml<sup>+</sup></i> | <i>WT/WT</i> | <i>db<sup>+</sup>/db<sup>+</sup></i> |
| Thailand RJF | Stippling | Individual | SAMEA5160208 | <i>ml<sup>+</sup>/ml<sup>+</sup></i> | <i>WT/WT</i> | <i>db<sup>+</sup>/db<sup>+</sup></i> |
| Thailand RJF | Stippling | Individual | SAMEA5160209 | <i>ml<sup>+</sup>/ml<sup>+</sup></i> | <i>WT/WT</i> | <i>db<sup>+</sup>/db<sup>+</sup></i> |
| Thailand RJF | Stippling | Individual | SAMEA5160210 | <i>ml<sup>+</sup>/ml<sup>+</sup></i> | <i>WT/WT</i> | <i>db<sup>+</sup>/db<sup>+</sup></i> |
| Thailand RJF | Stippling | Individual | SAMEA5160211 | <i>ml<sup>+</sup>/ml<sup>+</sup></i> | <i>WT/WT</i> | <i>db<sup>+</sup>/db<sup>+</sup></i> |
| Thailand RJF | Stippling | Individual | SAMEA5160212 | <i>ml<sup>+</sup>/ml<sup>+</sup></i> | <i>WT/WT</i> | <i>db<sup>+</sup>/db<sup>+</sup></i> |
| Thailand RJF | Stippling | Individual | SAMEA5160213 | <i>ml<sup>+</sup>/ml<sup>+</sup></i> | <i>WT/WT</i> | <i>db<sup>+</sup>/db<sup>+</sup></i> |
| Thailand RJF | Stippling | Individual | SAMEA5160214 | <i>ml<sup>+</sup>/ml<sup>+</sup></i> | <i>WT/WT</i> | <i>db<sup>+</sup>/db<sup>+</sup></i> |
| Thailand RJF | Stippling | Individual | SAMEA5160215 | <i>ml<sup>+</sup>/ml<sup>+</sup></i> | <i>WT/WT</i> | <i>db<sup>+</sup>/db<sup>+</sup></i> |
| Thailand RJF | Stippling | Individual | SAMEA5160216 | <i>ml<sup>+</sup>/ml<sup>+</sup></i> | <i>WT/WT</i> | <i>db<sup>+</sup>/db<sup>+</sup></i> |
| Thailand RJF | Stippling | Individual | SAMEA5160217 | <i>ml<sup>+</sup>/ml<sup>+</sup></i> | <i>WT/WT</i> | <i>db<sup>+</sup>/db<sup>+</sup></i> |
| Thailand RJF | Stippling | Individual | SAMEA5160218 | <i>ml<sup>+</sup>/ml<sup>+</sup></i> | <i>WT/WT</i> | <i>db<sup>+</sup>/db<sup>+</sup></i> |
| Thailand RJF | Stippling | Individual | SAMEA5160219 | <i>ml<sup>+</sup>/ml<sup>+</sup></i> | <i>WT/WT</i> | <i>db<sup>+</sup>/db<sup>+</sup></i> |
| Thailand RJF | Stippling | Individual | SAMEA5160220 | <i>ml<sup>+</sup>/ml<sup>+</sup></i> | <i>WT/WT</i> | <i>db<sup>+</sup>/db<sup>+</sup></i> |
| Thailand RJF | Stippling | Individual | SAMEA5160221 | <i>ml<sup>+</sup>/ml<sup>+</sup></i> | <i>WT/WT</i> | <i>db<sup>+</sup>/db<sup>+</sup></i> |
| Thailand RJF | Stippling | Individual | SAMEA5160222 | <i>ml<sup>+</sup>/ml<sup>+</sup></i> | <i>WT/WT</i> | <i>db<sup>+</sup>/db<sup>+</sup></i> |
| Thailand RJF | Stippling | Individual | SAMEA5160223 | <i>ml<sup>+</sup>/ml<sup>+</sup></i> | <i>WT/WT</i> | <i>db<sup>+</sup>/db<sup>+</sup></i> |

<sup>a</sup> RJF = red junglefowl

<sup>b</sup> The *ML*<sup>-</sup> and *ml<sup>+</sup>/ml<sup>+</sup>* genotype was inferred from plumage phenotype.

<sup>c</sup> Only the presence of the activating mutations E92K and L133Q/P are presented for *ML*<sup>-</sup> individuals; a careful analysis of *MC1R* variation among all the *ml<sup>+</sup>/ml<sup>+</sup>* birds were outside the scope of the present study.

**Table S4.** Sequence variants strongly associated with *Melanotic* and located within the IBD region on chicken chromosome 1

| Position on Chr.1 (bp) | Allele in Plymouth Rock | Allele in Cornish | dbSNP or sequence                                                                                                      |
|------------------------|-------------------------|-------------------|------------------------------------------------------------------------------------------------------------------------|
| 93,851,717             | C                       | A                 | rs316201461                                                                                                            |
| 93,852,277-93,852,317  | InDel1-WT               | InDel1- <i>MI</i> | InDel1-WT: TGAGGGTCAAAGAGAGTGCA-TGATCTCTGGAAAGGCCTAGG<br>InDel1- <i>MI</i> : AAATACTACTGCTTATTAAAC-TACTACTACTATTTAAGAT |
| 93,853,513             | T                       | A                 | rs312865584                                                                                                            |
| 93,857,288-93,857,293  | InDel2-WT               | InDel2- <i>MI</i> | InDel2-WT: GTCTGC<br>InDel2- <i>MI</i> : TCCTTGGTCCT                                                                   |
| 93,865,772             | C                       | T                 | rs317670985                                                                                                            |
| 93,866,099             | C                       | T                 | rs794497277                                                                                                            |

**Table S5.** List of DNA samples used for diagnostic tests for six candidate mutations of *MI*

| Breed               | Variety             | Source                 | Number of animals | Genotype <sup>a</sup>                |
|---------------------|---------------------|------------------------|-------------------|--------------------------------------|
| American Longtail   | Wild-type           | H & H Longtails        | 2                 | <i>ml<sup>+</sup>/ml<sup>+</sup></i> |
| B (Wild-type)       | Wild-type           | Tucson, AZ, U.S.       | 2                 | <i>ml<sup>+</sup>/ml<sup>+</sup></i> |
| Brahma              | Dark                | Ideal Poultry          | 1                 | <i>ml<sup>+</sup>/ml<sup>+</sup></i> |
| Brahma              | Dark                | Lucasville, OH, U.S.   | 1                 | <i>ml<sup>+</sup>/ml<sup>+</sup></i> |
| Buttercup           | Buttercup           | Lucasville, OH, U.S.   | 2                 | <i>ml<sup>+</sup>/ml<sup>+</sup></i> |
| Buttercup           | Buttercup           | Murray McMurray        | 2                 | <i>ml<sup>+</sup>/ml<sup>+</sup></i> |
| Campine             | Golden              | Raleigh, NC, U.S.      | 1                 | <i>ml<sup>+</sup>/ml<sup>+</sup></i> |
| Campine             | Silver Pencilled    | Canterbury, U.K.       | 2                 | <i>ml<sup>+</sup>/ml<sup>+</sup></i> |
| Chantecler          | Partridge           | Lucasville, OH, U.S.   | 1                 | <i>ml<sup>+</sup>/ml<sup>+</sup></i> |
| Cochin              | Golden laced        | Lucasville, OH, U.S.   | 1                 | <i>MI/-</i>                          |
| Cochin              | Partridge           | Murray McMurray        | 2                 | <i>ml<sup>+</sup>/ml<sup>+</sup></i> |
| Cornish             | Dark                | Murray McMurray        | 6                 | <i>MI/-</i>                          |
| Czech               | Golden              | Canterbury, U.K.       | 2                 | <i>ml<sup>+</sup>/ml<sup>+</sup></i> |
| Fayoumi             | Barred              | East Lansing, MI, U.S. | 1                 | <i>ml<sup>+</sup>/ml<sup>+</sup></i> |
| Fayoumi             | Barred              | Ideal Poultry          | 2                 | <i>ml<sup>+</sup>/ml<sup>+</sup></i> |
| Fayoumi             | Barred              | Ames, IA, U.S.         | 2                 | <i>ml<sup>+</sup>/ml<sup>+</sup></i> |
| Fayoumi             | Barred              | Ames, IA, U.S.         | 2                 | <i>ml<sup>+</sup>/ml<sup>+</sup></i> |
| Hamburg             | Golden Pencilled    | Murray McMurray        | 2                 | <i>ml<sup>+</sup>/ml<sup>+</sup></i> |
| Hamburg             | Silver Spangled     | Cackle Hatchery        | 1                 | <i>MI/-</i>                          |
| Hamburg             | Silver Spangled     | Macclesfield, NC, U.S. | 2                 | <i>MI/-</i>                          |
| Hamburg             | Silver Spangled     | Murray McMurray        | 2                 | <i>MI/-</i>                          |
| Hamburg             | Silver Spangled     | Canterbury, U.K.       | 2                 | <i>MI/-</i>                          |
| Red junglefowl      | Red                 | Richardson line        | 2                 | <i>ml<sup>+</sup>/ml<sup>+</sup></i> |
| Red junglefowl      | Red                 | Raleigh, NC, U.S.      | 2                 | <i>ml<sup>+</sup>/ml<sup>+</sup></i> |
| Malay               | Red                 | Ideal Poultry          | 1                 | <i>ml<sup>+</sup>/ml<sup>+</sup></i> |
| New Hampshire       | Red                 | Ideal Poultry          | 1                 | <i>ml<sup>+</sup>/ml<sup>+</sup></i> |
| New Hampshire       | Red                 | Canterbury, U.K.       | 2                 | <i>ml<sup>+</sup>/ml<sup>+</sup></i> |
| Phoenix             | Golden              | Ideal Poultry          | 1                 | <i>ml<sup>+</sup>/ml<sup>+</sup></i> |
| Phoenix             | Silver              | Marshfield, WI, U.S.   | 1                 | <i>ml<sup>+</sup>/ml<sup>+</sup></i> |
| Phoenix             | Silver Duckwing     | Ideal Poultry          | 1                 | <i>ml<sup>+</sup>/ml<sup>+</sup></i> |
| Plymouth Rock       | Partridge           | Murray McMurray        | 2                 | <i>ml<sup>+</sup>/ml<sup>+</sup></i> |
| Plymouth Rock       | Silver pencilled    | Murray McMurray        | 2                 | <i>ml<sup>+</sup>/ml<sup>+</sup></i> |
| Polish <sup>b</sup> | Buff laced          | Macclesfield, NC, U.S. | 2                 | <i>MI/-</i>                          |
| Polish <sup>b</sup> | White Crested Black | Murray McMurray        | 1                 | <i>MI/-</i>                          |
| Polish <sup>b</sup> | White Crested Black | Canterbury, U.K.       | 1                 | <i>MI/-</i>                          |
| Polish <sup>b</sup> | White Crested Black | Lucasville, OH, U.S.   | 1                 | <i>MI/-</i>                          |
| Polish <sup>b</sup> | White Crested Black | Marshfield, WI, U.S.   | 1                 | <i>MI/-</i>                          |

|                     |                     |                        |    |                                      |
|---------------------|---------------------|------------------------|----|--------------------------------------|
| Polish <sup>b</sup> | White Crested Black | Raleigh, NC, U.S.      | 2  | <i>ML/-</i>                          |
| Polish <sup>b</sup> | White Crested Blue  | Lucasville, OH, U.S.   | 1  | <i>ML/-</i>                          |
| Rhode Island        | Red                 | East Lansing, MI, U.S. | 1  | <i>ml<sup>+</sup>/ml<sup>+</sup></i> |
| Rhode Island        | Red                 | Macclesfield, NC, U.S. | 2  | <i>ml<sup>+</sup>/ml<sup>+</sup></i> |
| Rhode Island        | Red                 | Canterbury, U.K.       | 2  | <i>ml<sup>+</sup>/ml<sup>+</sup></i> |
| Saipan junglefowl   | Wild-type           | East Lansing, MI, U.S. | 1  | <i>ml<sup>+</sup>/ml<sup>+</sup></i> |
| Sebright            | Golden              | Lucasville, OH, U.S.   | 1  | <i>ML/-</i>                          |
| Sebright            | Golden              | Macclesfield, NC, U.S. | 2  | <i>ML/-</i>                          |
| Sebright            | Silver              | Macclesfield, NC, U.S. | 2  | <i>ML/-</i>                          |
| Sebright            | Silver              | Murray McMurray        | 16 | <i>ML/-</i>                          |
| Sicilian Buttercup  | Buttercup           | Ideal Poultry          | 2  | <i>ml<sup>+</sup>/ml<sup>+</sup></i> |
| Spitzhauben         | Spangled            | Cackle Hatchery        | 1  | <i>ML/-</i>                          |
| Spitzhauben         | Spangled            | Raleigh, NC, U.S.      | 2  | <i>ML/-</i>                          |
| Wyandotte           | Partridge           | Murray McMurray        | 2  | <i>ml<sup>+</sup>/ml<sup>+</sup></i> |
| Wyandotte           | Silver penciled     | Murray McMurray        | 2  | <i>ml<sup>+</sup>/ml<sup>+</sup></i> |

<sup>a</sup> Inferred from plumage phenotype

<sup>b</sup> As previously reported (J. W. Moore, J. R. Smyth, Melanotic: Key to a phenotypic enigma in the fowl. *J. Hered.* **62**, 215–219 (1971)) Polish chickens are *ML/ML*

**Table S6.** Primers used for diagnostic tests, qPCR, and allelic imbalance tests in this study

| Primer name          | Amplification target        | Primer sequence (5'-3')        | Product size (bp) | T <sub>m</sub> (°C) |
|----------------------|-----------------------------|--------------------------------|-------------------|---------------------|
| InDel1_F1            | InDel1-<br>WT               | GAGGGTCAAAGAGAGTGCATGA         | 108               | 61                  |
| InDel1_R             |                             | GTATAAATTGAATGCAAATGCAAGG      |                   |                     |
| InDel1_F2            |                             | CAGGTTAGATGCTTATTAACTACT-GCTTA | 123               |                     |
| InDel2_R1            | InDel2-<br>WT               | AGGACCAAGGCGCAGACTC            | 96                | 62                  |
| InDel2_F             |                             | AGCATCATTGGCCTGGAGA            |                   |                     |
| InDel2_R2            |                             | CAACAGGACCAAGGCAGGAC           | 105               |                     |
| GJA5_A_F             | NM_205504.2                 | CCGCTCCTCCCTCCACCTGT           | 100               | 65                  |
| GJA5_A_R             |                             | TCCCCCATTTCTGCTCACCA           |                   |                     |
| MC1R_F               | MC1R                        | CTTTGTAGGTGCTGCAGTTGTG         | 1,049             | 62                  |
| MC1R_R               |                             | ATCCATCCATCCTCCTGTCTGT         |                   |                     |
| GJA5_B_F             | XM_015295951.2              | GCTGTAAGAATACCTTACAAGCAA       | 135               | 60                  |
| GJA5_R <sup>a</sup>  |                             | TGTGGAGTGCTTGTGGACCTCCT        |                   |                     |
| GJA5_C_F             | XM_015295948.2              | TCAGTGCCTCTCAGCGTGTGAC         | 168               | 65                  |
| GJA5_D_F             | XM_015295941.1              | GGAGGCAGAAGAAAAGACACTGGA       | 140               | 65                  |
| GJA8_F1              | XM_015295800.2 &            | CCCAATGGCTTGTGTAAAACCTTGGA     | 141               | 65                  |
| GJA8_R1 <sup>b</sup> | XM_015295822.2              | CCCAGGATCAGGATGCGGAAA          |                   |                     |
| GJA8_F2              | All <i>GJA8</i> transcripts | GGTGACTGGAGTTTCTTGGGGAACA      | 110               | 65                  |
| GJA8_F3              | All <i>GJA8</i> transcripts | TCGTGGTGGCTGCTGTGTCC           | 118               | 65                  |
| GJA8_R3              |                             | TCTGGCACCTCCCCCATCTG           |                   |                     |
| GJA8_F4              | All <i>GJA8</i> transcripts | TTGAGCCCAGTCCCCTTCCA           | 127               | 65                  |
| GJA8_F4              |                             | TCCGTTTCCTTCGCTTGTGC           |                   |                     |
| Actin_F              | NM_205518.1                 | TGCGTGACATCAAGGAGAAG           | 111               | 60 or               |
| Actin_R              |                             | GACCATCAGGGAGTTCATAGC          |                   | 65                  |
| GJA5_AI_F            | For allelic imbalance test  | TGGTGGGGAAGGTCTGGTTGA          | 1035              | 65                  |
| GJA5_AI_R            |                             | CTGACCTCGCCTTGCTGCTG           |                   |                     |

<sup>a</sup> During qPCR, GJA5\_R was also used as the reverse primer with GJA5\_C\_F and GJA5\_D\_F, respectively.

<sup>b</sup> During qPCR, GJA8\_R1 was also used as the reverse primer with GJA8\_F2.

**Table S7.** Variable amino acid residues among *MC1R* alleles identified in pools of Partridge Plymouth Rock and Dark Cornish and confirmed by Sanger sequencing

| Breed                   | Frequency <sup>a</sup> | Variant sites |     |     |     |     |     |     | Allele <sup>b</sup> |
|-------------------------|------------------------|---------------|-----|-----|-----|-----|-----|-----|---------------------|
|                         |                        | 71            | 92  | 133 | 137 | 143 | 213 | 215 |                     |
| Reference               | n.a.                   | Met           | Glu | Leu | Ala | Thr | Cys | His | <i>WT</i>           |
| Partridge Plymouth Rock | 1                      | Thr           | Lys | -   | -   | -   | -   | Pro | <i>B1</i>           |
|                         | 0.62                   | -             | Lys | -   | Thr | -   | -   | -   | <i>B2</i>           |
| Dark Cornish            | 0.25                   | -             | -   | Pro | -   | Ala | Arg | -   | <i>BC</i>           |
|                         | 0.13                   | -             | -   | Pro | -   | -   | Arg | -   | <i>UN</i>           |

<sup>a</sup> Calculated based on the number of reads in pooled WGS data. n.a.=not applicable.

<sup>b</sup> *B1* (*Brown1*), *B2* (*Brown2*), and *BC* (*buttercup*) were all included in the summary by Andersson et al. (“The genetic basis for pigmentation phenotypes in poultry” in *Advances in Poultry Genetics and Genomics*, S. E. Aggrey, H. Zhou, M. Tixier-Boichard, D. D. Rhoads, Eds. (Burleigh Dodds Science Publishing, 2020), pp. 67–106.); *UN* (*uncharacterized*) has been reported by Guo et al. (Genetic variation of chicken *MC1R* gene in different plumage colour populations. *Br. Poult. Sci.* **51**, 734–739 (2010)).

**Table S8.** The distribution of *MI* and *MC1R* genotypes among different phenotypes in the backcross population

| Phenotype                       | <i>MI</i> genotype <sup>a</sup>                 | <i>MC1R</i> genotype |              |              |              | n  | $\chi^2$ test<br>P-value |
|---------------------------------|-------------------------------------------------|----------------------|--------------|--------------|--------------|----|--------------------------|
|                                 |                                                 | <i>B1/B1</i>         | <i>B1/B2</i> | <i>B1/BC</i> | <i>B1/UN</i> |    |                          |
| Double recombinant <sup>b</sup> | <i>MI/ml</i> <sup>+</sup>                       | 5                    | 4            | 0            | 0            | 9  | 0.48                     |
| Double lacing                   | <i>MI/ml</i> <sup>+</sup>                       | 14                   | 10           | 5            | 2            | 31 |                          |
| Intermediate                    | <i>MI/ml</i> <sup>+</sup>                       | 6                    | 4            | 0            | 0            | 10 | 0.43                     |
|                                 | <i>ml</i> <sup>+</sup> / <i>ml</i> <sup>+</sup> | 8                    | 1            | 0            | 0            | 9  |                          |
| Pencilling                      | <i>ml</i> <sup>+</sup> / <i>ml</i> <sup>+</sup> | 23                   | 17           | 4            | 1            | 45 | 0.22                     |

<sup>a</sup> Based on genotyping InDel1.

<sup>b</sup> The backcross individuals that show pencilling pattern but carry the *MI* haplotype.
